# Supplementary material for: Regulation of lung injury and repair by Toll-like receptors and hyaluronan
Source: Springer Nature journal article supplement (doi:10.1038/nm1315), 2005-10-23
Supplement: 41591_2005_BFnm1315_MOESM1_ESM.pdf [file 41591_2005_BFnm1315_MOESM1_ESM.pdf]

**a**

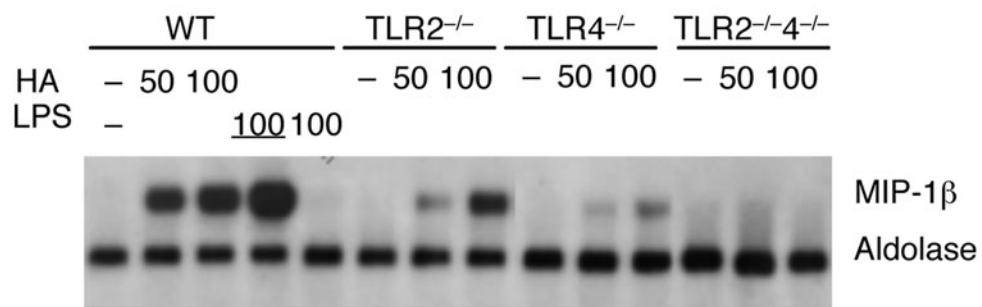

**b**

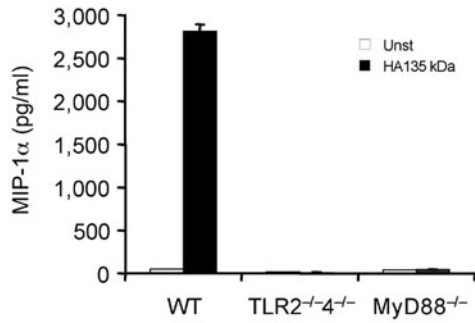

**c**

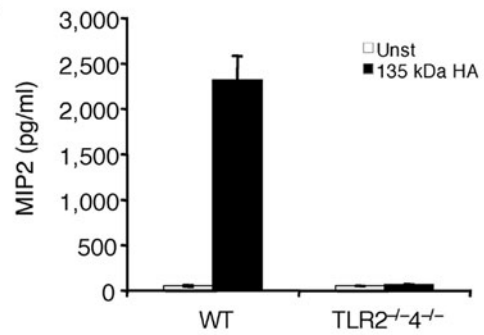

**Supplementary Figure 1.** HA-induced chemokine expression is TLR2/4- and MyD88-dependent. **(a)** MIP-1 $\beta$  mRNA expression by peritoneal macrophages from wild type (WT), TLR2<sup>-/-</sup>, TLR4<sup>-/-</sup>, or TLR2<sup>-/-</sup>4<sup>-/-</sup> treated with 135 kDa HA fragments (  $\mu$ g/ml) or LPS (ng/ml) in the presence or absence (underlined) of polymyxin B for 4 hours. **(b)** MIP-1 $\alpha$  protein expression by peritoneal macrophages from WT, TLR2<sup>-/-</sup>4<sup>-/-</sup>, and MyD88<sup>-/-</sup>, treated with 100  $\mu$ g/ml of 135 kDa HA fragments (in the presence of polymyxin B) for 24 hours. Unst, Unstimulated. **(c)** MIP-2 protein expression by bone marrow macrophages from WT and TLR2<sup>-/-</sup>4<sup>-/-</sup> treated with 100  $\mu$ g/ml of 135 kDa HA fragments (in the presence of polymyxin B) for 24 hours.
