# Supplementary material for: Regulation of lung injury and repair by Toll-like receptors and hyaluronan
Source: Springer Nature journal article supplement (doi:10.1038/nm1315), 2005-10-23
Supplement: 41591_2005_BFnm1315_MOESM2_ESM.pdf [file 41591_2005_BFnm1315_MOESM2_ESM.pdf]

a

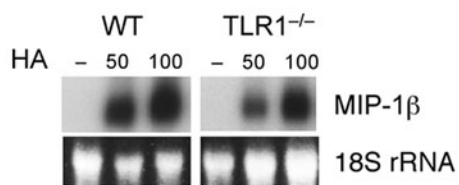

b

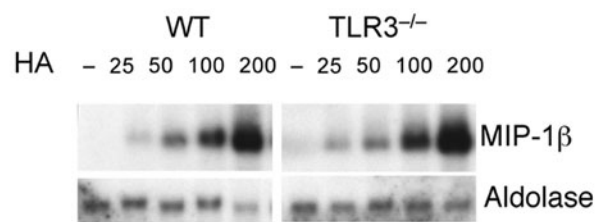

c

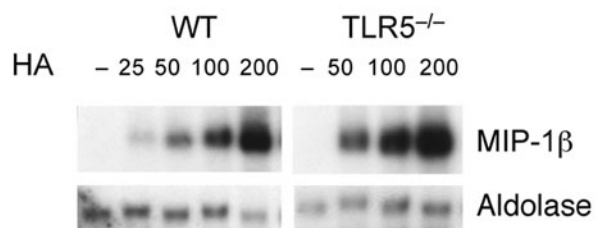

d

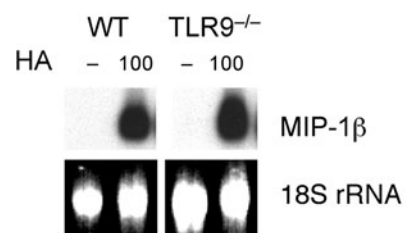

**Supplementary Figure 2.** HA-induced chemokine expression is independent of TLR-1, -3, -5, and -9. MIP-1 $\beta$  expression by peritoneal macrophages from wild type (WT), TLR1<sup>-/-</sup> (a), TLR3<sup>-/-</sup> (b), TLR5<sup>-/-</sup> (c), and TLR9<sup>-/-</sup> mice (d) treated with indicated concentration of HA fragments ( g/ml) in the presence of polymyxin B. Aldolase or 18S rRNA was indicated.
