# Supplementary material for: Regulation of lung injury and repair by Toll-like receptors and hyaluronan
Source: Springer Nature journal article supplement (doi:10.1038/nm1315), 2005-10-23
Supplement: 41591_2005_BFnm1315_MOESM3_ESM.pdf [file 41591_2005_BFnm1315_MOESM3_ESM.pdf]

a

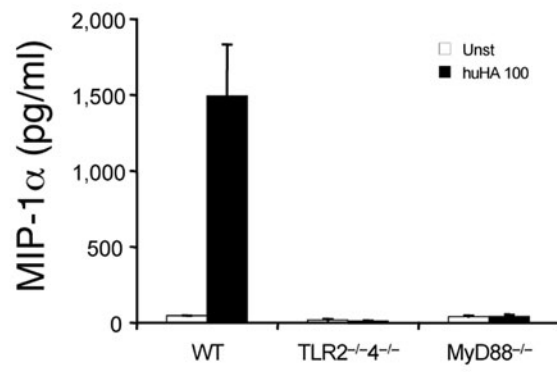

b

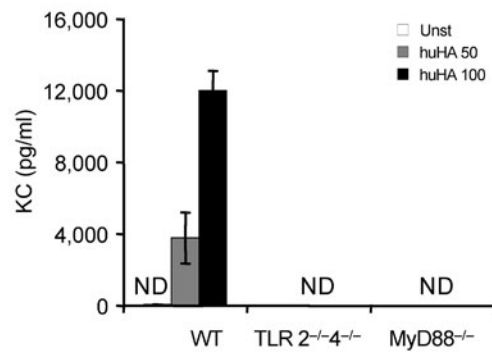

**Supplementary Figure 3.** Chemokine MIP-1 $\alpha$  (a) and KC (b) protein expression by peritoneal macrophages from wild type (WT), TLR2<sup>-/-</sup>4<sup>-/-</sup>, or MyD88<sup>-/-</sup> mice, treated with either 50 (grey bars) or 100 g/ml (black bars) of human HA fragments purified from serum of patients with acute lung injury ( $n = 3$ ). Unst, Unstimulated. ND, not detectable.
