# Supplementary material for: Regulation of lung injury and repair by Toll-like receptors and hyaluronan
Source: Springer Nature journal article supplement (doi:10.1038/nm1315), 2005-10-23
Supplement: 41591_2005_BFnm1315_MOESM5_ESM.pdf [file 41591_2005_BFnm1315_MOESM5_ESM.pdf]

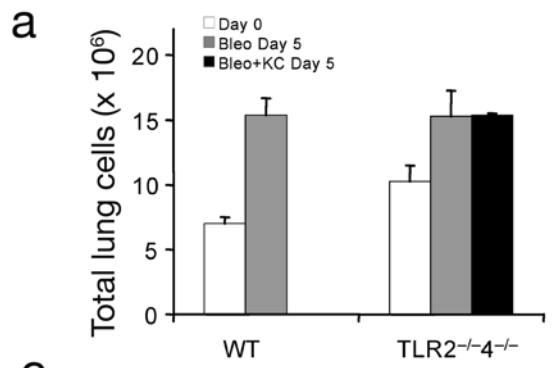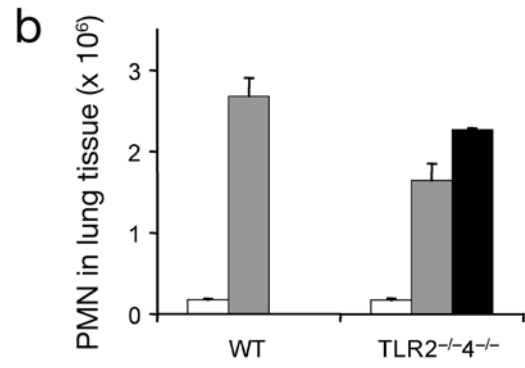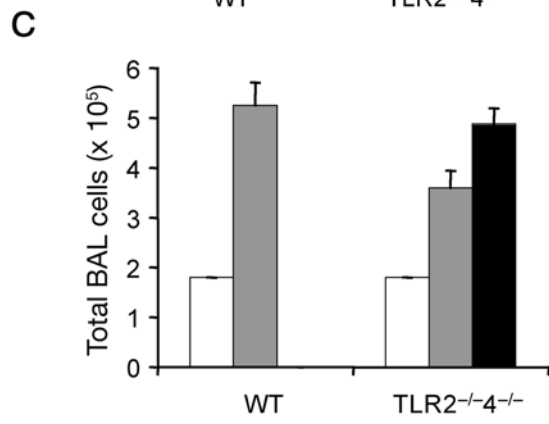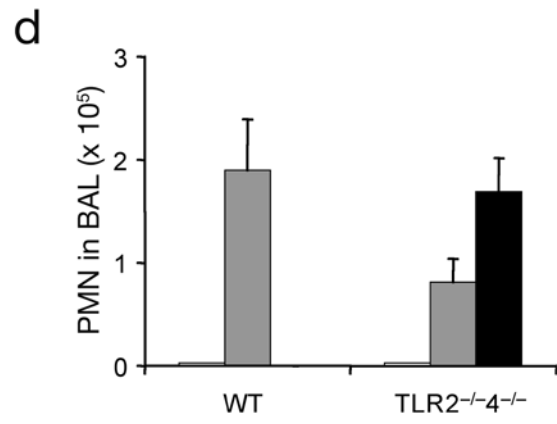

**Supplementary figure 5.** Effect of exogenous KC on inflammatory response to bleomycin lung injury. Wild type and TLR2<sup>-/-</sup>4<sup>-/-</sup> mice received bleomycin at 5 U/kg intratracheally, and one group of TLR2<sup>-/-</sup>4<sup>-/-</sup> also received exogenous KC. **(a)** Total leukocytes in lung tissues day 5 after bleomycin (grey bars), or bleomycin with exogenous KC intramuscularly daily (black bars). **(b)** Neutrophils in lung tissue were measured based on total cell number and neutrophil percentage assessed by staining neutrophil marker Gr-1 via flow cytometry. **(c)** Total cells in BAL day 5 after bleomycin, or bleomycin with exogenous KC. **(d)** Neutrophils in BAL were measured based on total cell number and neutrophil percentage assessed by differential cell counting ( $n = 4$ ).
