# Supplementary material for: Regulation of lung injury and repair by Toll-like receptors and hyaluronan
Source: Springer Nature journal article supplement (doi:10.1038/nm1315), 2005-10-23
Supplement: 41591_2005_BFnm1315_MOESM6_ESM.pdf [file 41591_2005_BFnm1315_MOESM6_ESM.pdf]

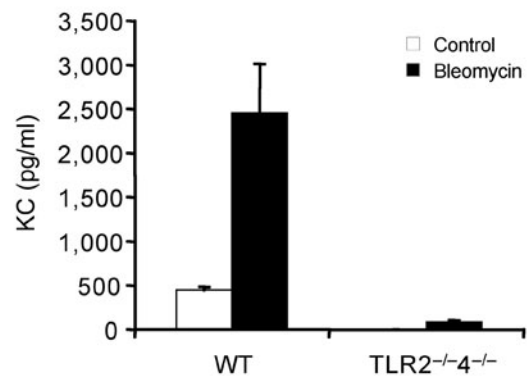

**Supplementary Figure 6.** Impaired KC induction by TLR2<sup>-/-</sup>4<sup>-/-</sup> lung epithelial cells in response to bleomycin treatment. The purified primary lung epithelial cells from WT, or TLR2<sup>-/-</sup>4<sup>-/-</sup> mice were treated with bleomycin for 24 hours. Chemokine KC protein in 24-hour conditioned media was measured with an ELISA (*n* = 5).
