# Supplementary material for: Regulation of lung injury and repair by Toll-like receptors and hyaluronan
Source: Springer Nature journal article supplement (doi:10.1038/nm1315), 2005-10-23
Supplement: 41591_2005_BFnm1315_MOESM7_ESM.pdf [file 41591_2005_BFnm1315_MOESM7_ESM.pdf]

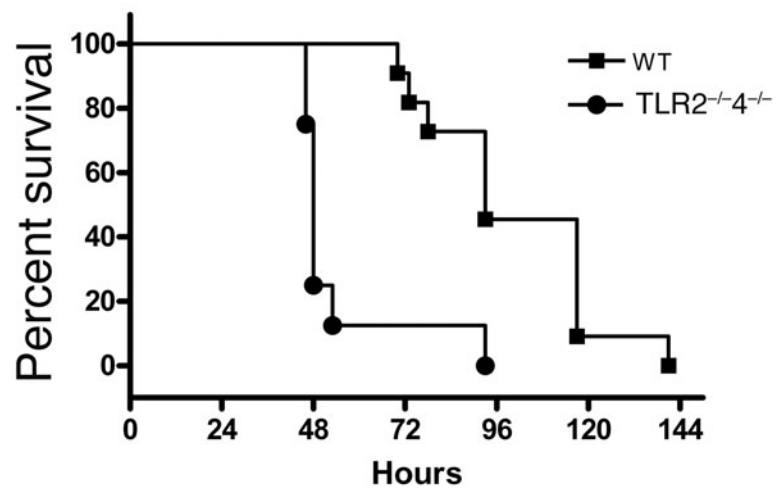

**Supplementary Figure 7.** TLR2<sup>-/-</sup>4<sup>-/-</sup> mice were more susceptible to hyperoxia. Wild type (WT) and TLR2<sup>-/-</sup>4<sup>-/-</sup> mice were exposed to > 99% O<sub>2</sub> and monitored for survival. WT had a median survival of 93 hours (*n* = 11), whereas TLR2<sup>-/-</sup>4<sup>-/-</sup> had 48 hours (*n* = 8), *P* = 0.0003 by the long-rank test.
