# Supplementary material for: Regulation of lung injury and repair by Toll-like receptors and hyaluronan
Source: Springer Nature journal article supplement (doi:10.1038/nm1315), 2005-10-23
Supplement: 41591_2005_BFnm1315_MOESM8_ESM.pdf [file 41591_2005_BFnm1315_MOESM8_ESM.pdf]

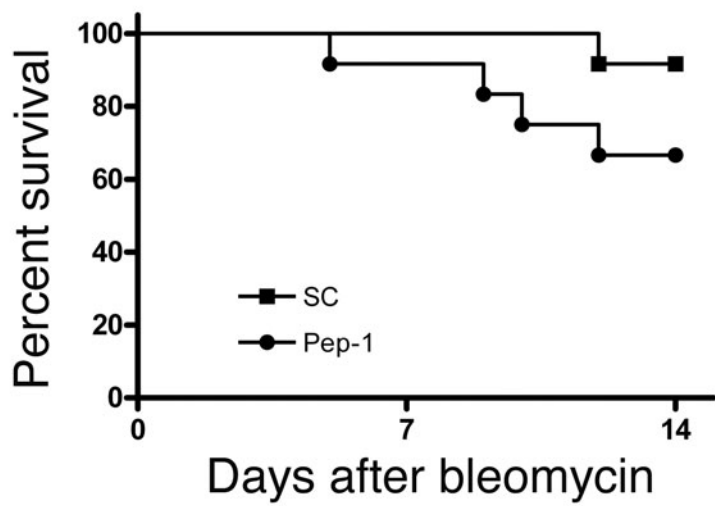

**Supplementary Figure 8.** Survival curves of wild type mice with bleomycin lung injury in the presence of HA blocking peptide Pep-1 or scrambled peptide (SC). Peptides were given at a dose of 0.8 mg/mouse intraperitoneally 2 hours before and repeated on days 3, 5, and 8 post bleomycin treatment ( $n = 8$ ).
